# Supplementary material for: Polarity-dependent solvatochromic properties of thermally activated delayed fluorescence with donor–acceptor constituents under different excitation energies
Source: Royal Society of Chemistry journal article supplement (doi:10.1039/d1tc03044b), 2021-01-01
Supplement: d1tc03044b1.pdf [file d1tc03044b1.pdf]

## Supplementary Information

### **Polarity-dependent solvatochromic properties of thermally activated delayed fluorescence with donor-acceptor constitute under different excitation energy**

Haiyang Xu,<sup>a</sup> Shuzhe Li, <sup>b</sup>Minyu Chen,<sup>a,c,d</sup> Yachen Xu, <sup>a,c</sup> Pengchao Zhou, <sup>a,c</sup> Zhen Zhang, <sup>a,c</sup> Yingjie Liao,\* <sup>a,c</sup> Bin Wei \* <sup>a,c</sup>

#### **The file includes:**

Figure S1. Photoluminescence spectra of DpAn-InAc under the excitation wavelength of 390 nm.

Figure S2. Photoluminescence spectra of DpAn-InAc in acetonitrile solutions excited by different wavelengths.

Figure S3. <sup>1</sup>H nuclear magnetic resonance (NMR) spectrum of DpAn-InAc.

Figure S4. High resolution mass spectrometry of DpAn-InAc.

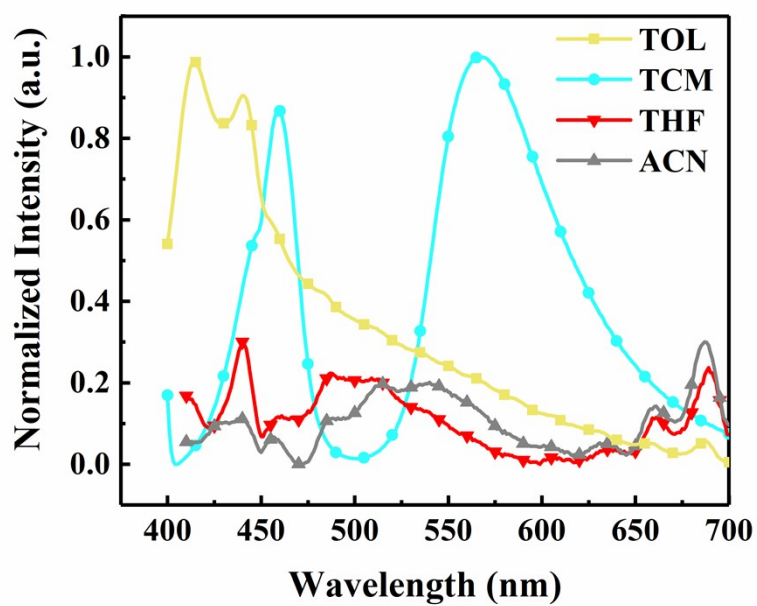

Figure S1. Photoluminescence spectra of DpAn-InAc under the excitation wavelength of 390 nm.

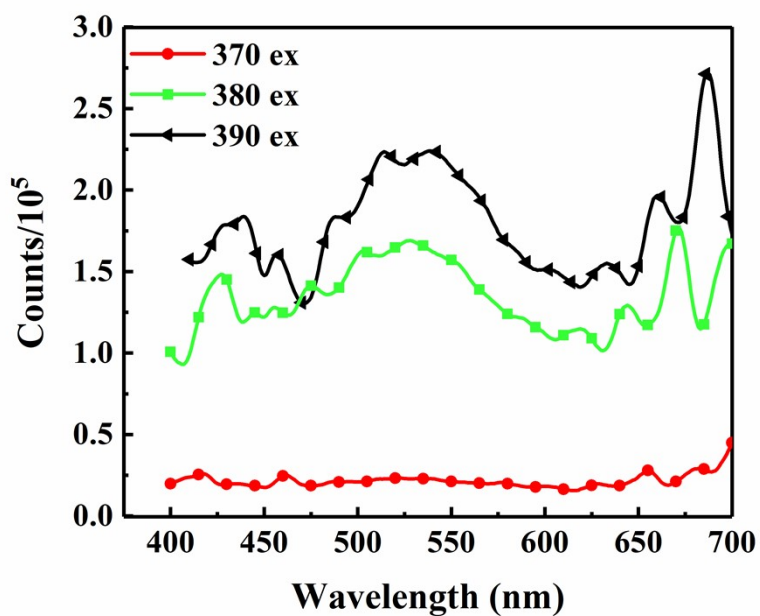

Figure S2. Photoluminescence spectra of DpAn-InAc in acetonitrile solutions excited by different wavelengths.

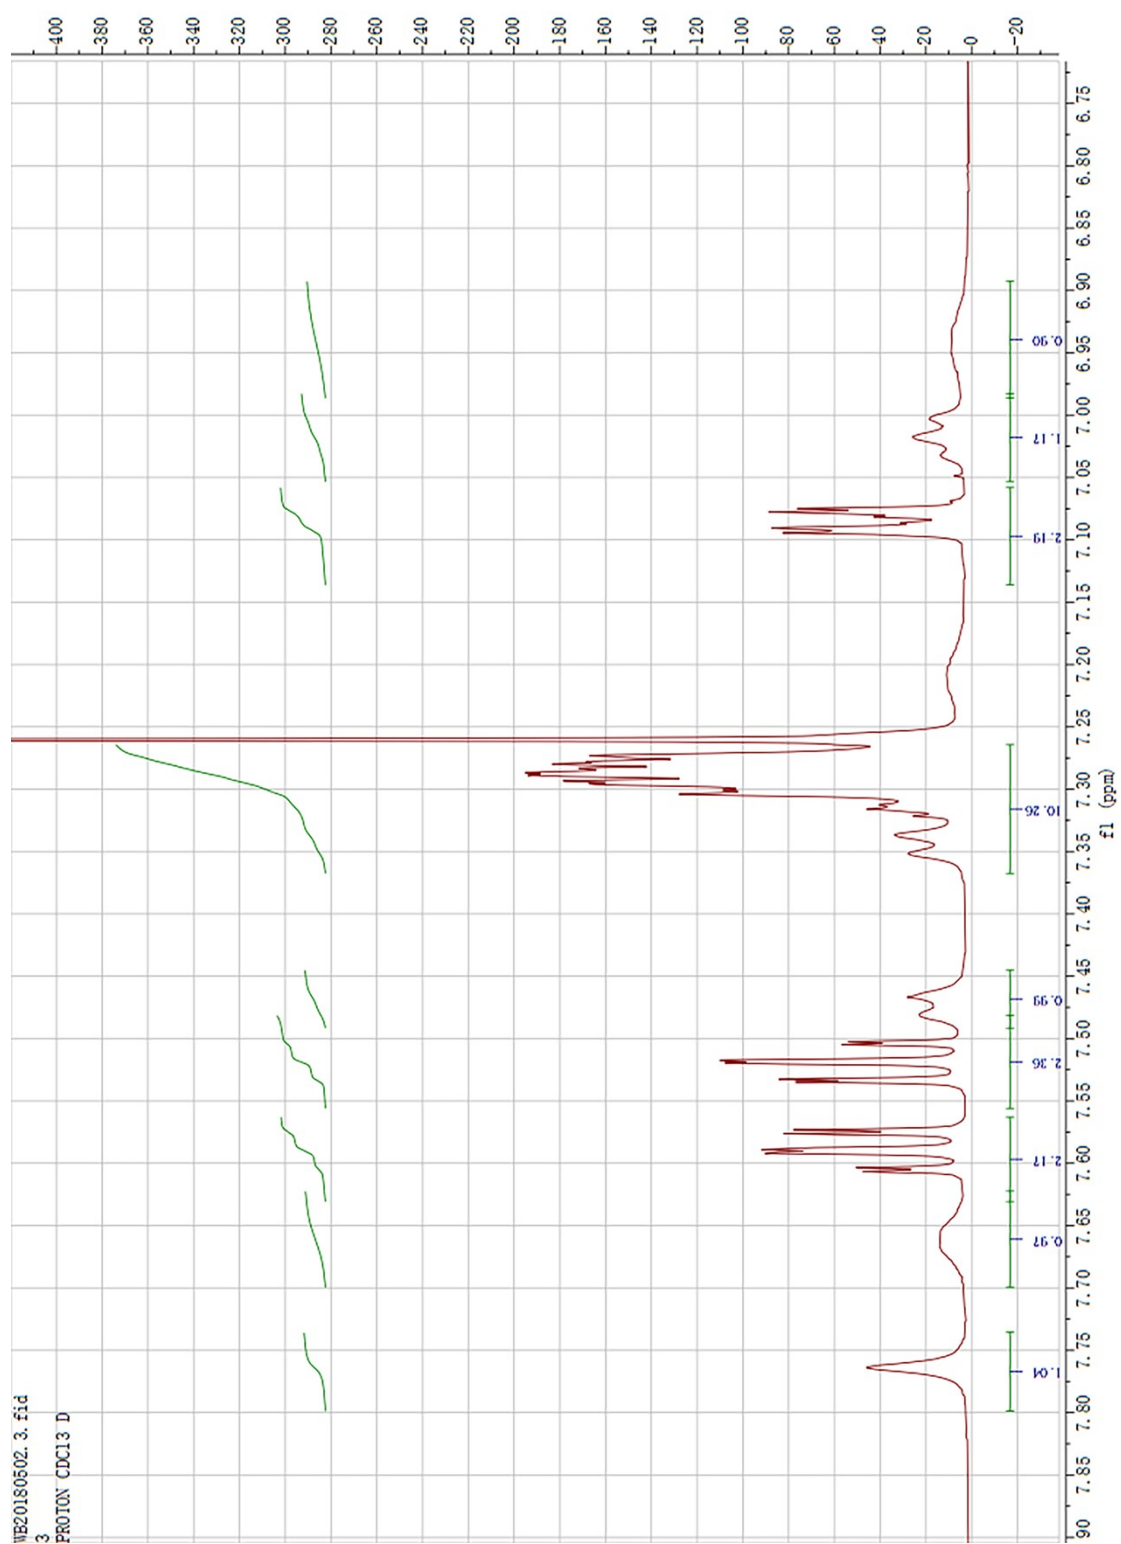

Figure S3.  $^1\text{H}$  nuclear magnetic resonance (NMR) spectrum of DpAn-InAc.

2105287357 #9, RT: 0.15, AV: 1, NL: 2.74E5  
T: FTMS + p ESI Full ms [100.0000-1500.0000]

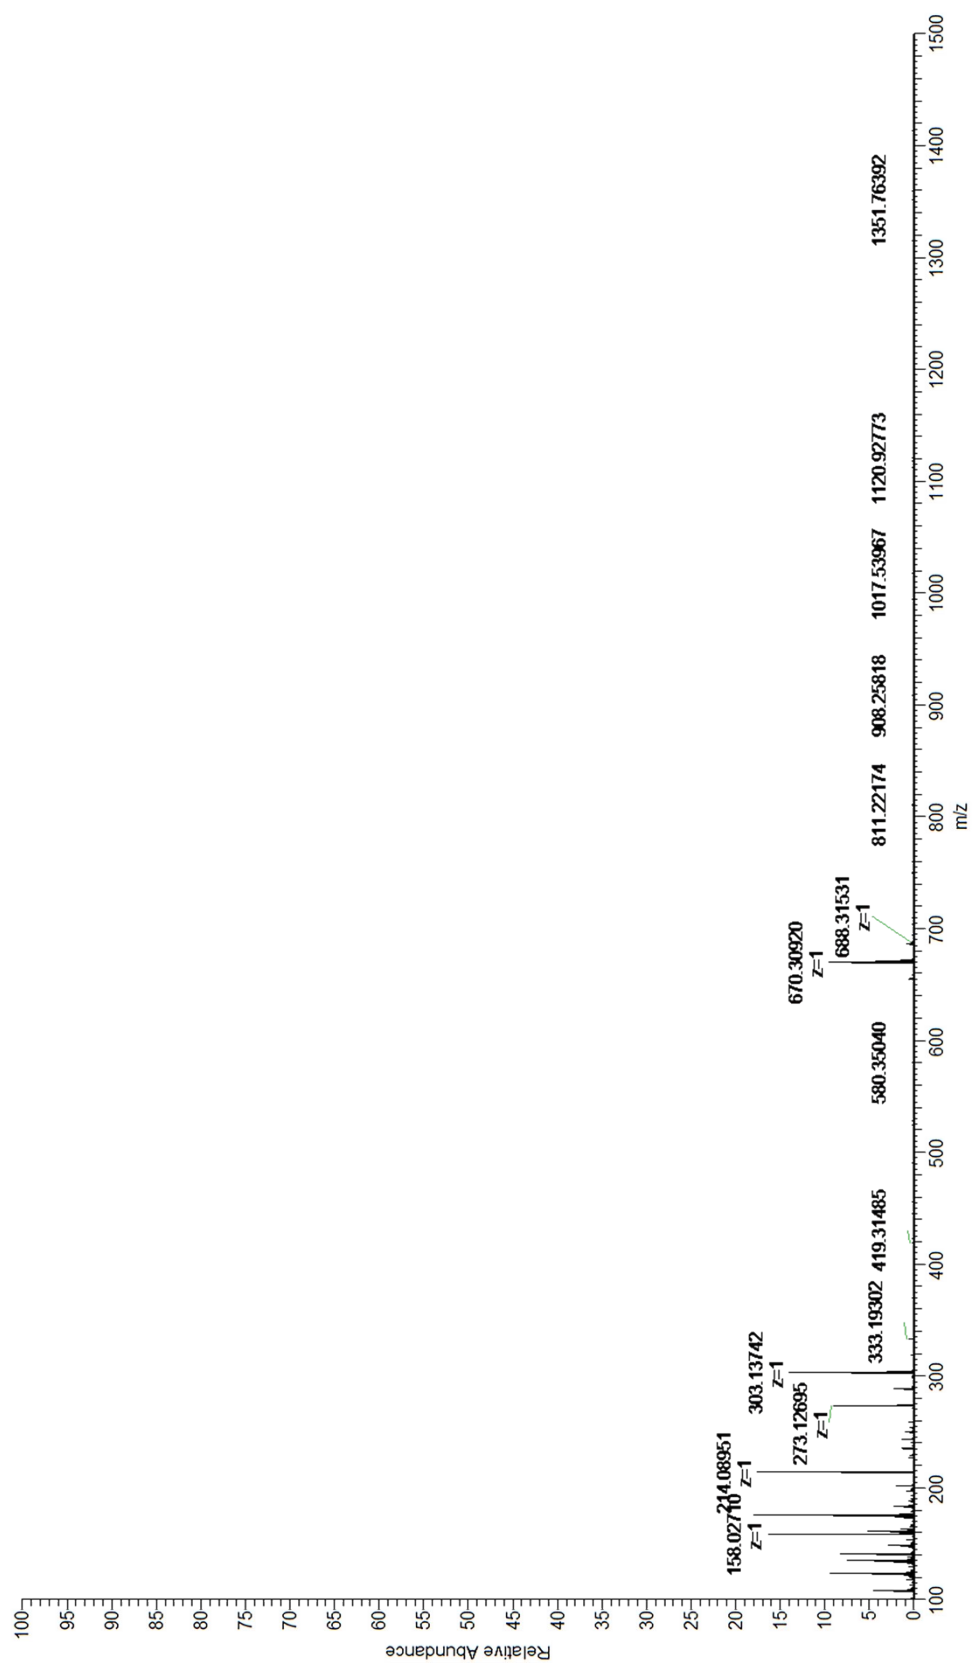

Figure S4. High resolution mass spectrum of DpAn-InAc.
